# Supplementary material
Source: PubMed Central journal article supplement (PMC7689890)
Supplement: ao0c04402_si_001.pdf [file ao0c04402_si_001.pdf]

# Antibacterial Porous Electrospun Fibers as Skin Scaffolds for Wound Healing Applications

*Georg-Marten Lanno<sup>a</sup>, Celia Ramos<sup>b</sup>, Liis Preem<sup>b</sup>, Marta Putrinš<sup>a</sup>, Ivo Laidmäe<sup>b,c</sup>, Tanel Tenson<sup>a</sup>, Karin Kogermann<sup>b</sup>*

*<sup>a</sup>Institute of Technology, University of Tartu, Nooruse 1, 50411 Tartu, Estonia*

*<sup>b</sup>Institute of Pharmacy, University of Tartu, Nooruse 1, 50411 Tartu, Estonia.*

*<sup>c</sup>Department of Immunology, Institute of Biomedicine and Translational Medicine, University of Tartu, Ravila 19, 50411, Tartu, Estonia*

Number of pages: 6

Number of figures: 5

## **DMSO stocks preparation**

Overnight culture was diluted 100 times in fresh LB medium (100  $\mu$ L on bacteria in 10 mL medium) and grown at 37°C aerobically to an exponential phase. At optical density of 0.8 (OD<sub>600</sub>), dimethyl sulfoxide (DMSO) was added to a final concentration of 8%. 120  $\mu$ L of suspension was added to PCR tubes and frozen in liquid nitrogen. The tubes were stored in - 80°C and used within 6 months.

## Bacterial attachment, growth and bacterial biofilm formation

Overnight liquid culture of bacteria in LB was grown from DMSO stocks. The culture was diluted to about  $5 \times 10^7$  colony-forming units (CFU)/mL with DMEM supplemented with 10% heat-inactivated FBS. 1 mL of the bacterial dispersion was added to 1 cm<sup>2</sup> square-shaped samples in 24 well-plates. The well-plates were incubated at 37°C for 24, 48 or 72 h. After that the samples were rinsed twice with 1 x PBS and put into 1 mL of fresh 1 x PBS in 1.5 ml Eppendorf tube. For disrupting the biofilm alternating vortexing (Vortex-Genie 2, Scientific Industries) and sonication (Bandelin Sonorex digital 10 P, operating at 20% of maximum power) was performed in 30 s cycles. Each cycle was repeated 6 times, as this was seen to provide the best compromise between biofilm disruption and bacterial viability. The CFUs were determined by making 10-times dilutions of the dispersion, plating these as 5  $\mu$ L drops on LB agar plates and counting the CFUs at optimal dilutions after 18 h of incubation. Planktonic bacteria in each time point were always plated as controls in order to verify the growth of bacteria in each condition. A minimum of three technical replicates were performed.

## Characterization of surface pores on electrospun fibers

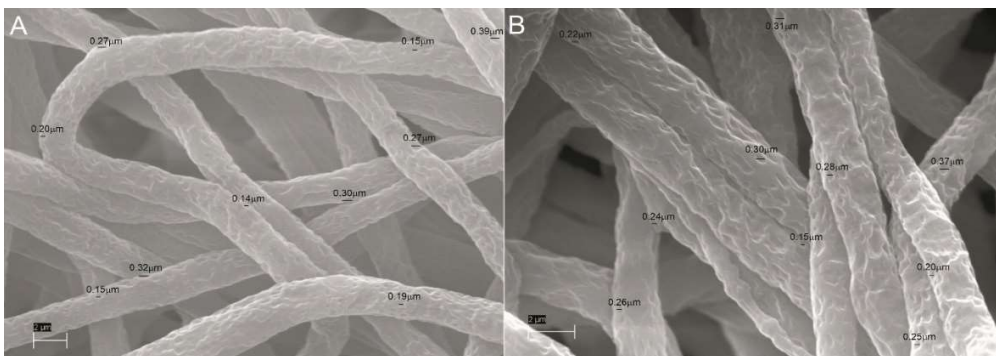

**Figure S1.** SEM micrographs of surface pore analysis for A. Porous microfibers and B. Porous microfibers with CAM. (Magnification 10000x).

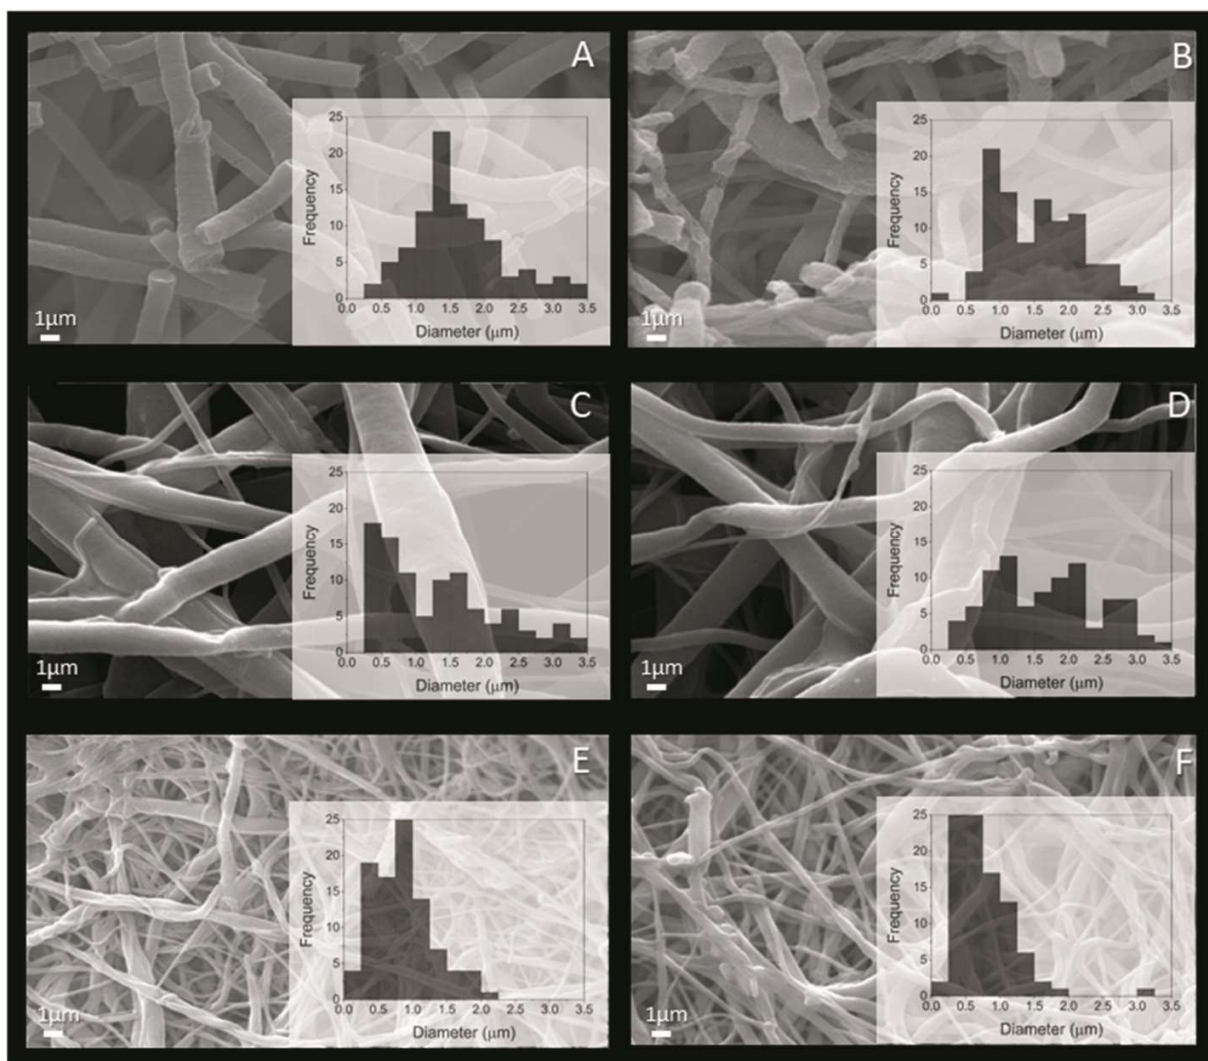

**Figure S2.** SEM micrographs after swelling experiment (24 h at 37°C in 1 x PBS). A – porous microfibers; B – porous microfibers with CAM; C – non-porous microfibers; D- non-porous microfibers with CAM; E – non-porous nanofibers; F- non-porous nanofibers with CAM.

## Cell adhesion and migration into the scaffold structure

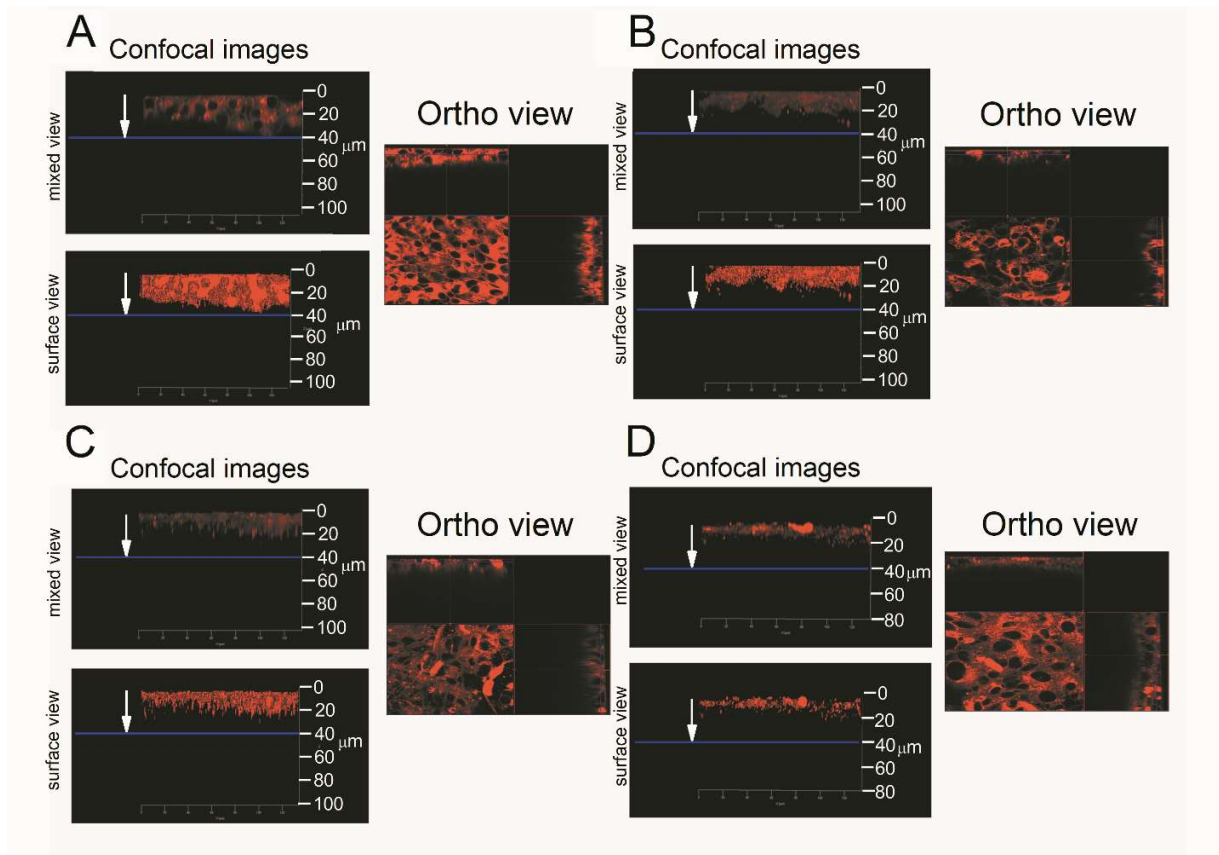

**Figure S3.** Confocal fluorescent microscopy (CFM) images fibroblast cells (BHK-21) attached onto electrospun **A.** porous PCL microfiber scaffold consisting CAM; **B.** non-porous PCL microfiber scaffold; **C.** non-porous PCL nanofiber scaffold; **D.** non-porous PCL nanofiber scaffolds consisting CAM. Cross-section micrographs (mixed and surface view) and orthographic projection (ortho view) of 3D images are shown. The white arrows on Figures **C,D,E** indicate the fibroblast infiltration from 0 – 40 μm (blue line) in depth. The pictures were constructed from 101 slices of z-stack images with the depth of 134.95 μm.

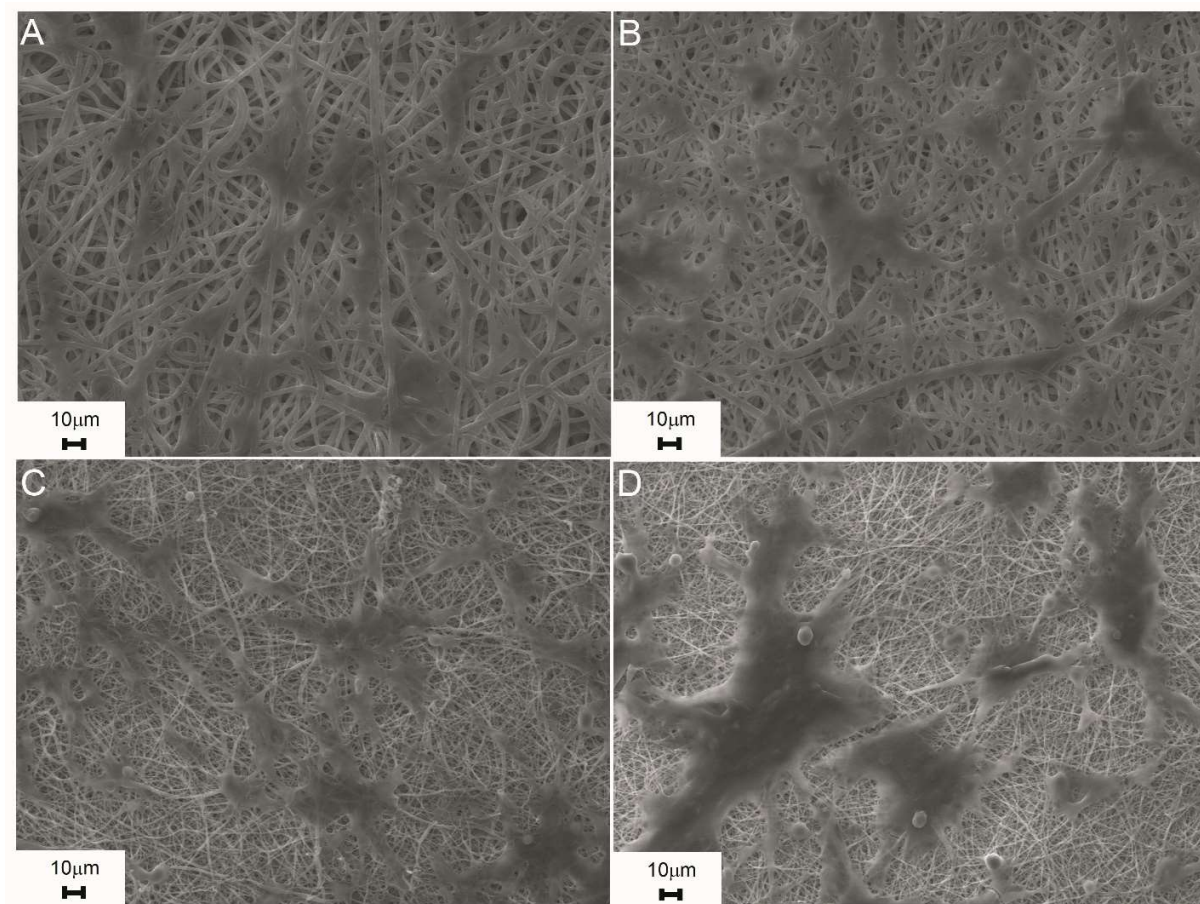

**Figure S4.** Scanning electron microscopy (SEM) micrographs of fibroblast cells (BHK-21) attached to porous and non-porous electrospun PCL microfiber and nanofiber scaffolds without and with CAM (magnification 1000x). **A.** Porous PCL microfiber scaffold; **B.** Porous PCL microfiber scaffolds with CAM; **C.** Non-porous nanofiber scaffold; **D.** Non-porous nanofiber scaffold with CAM.

## Bacterial cell attachment and biofilm formation using *P. aeruginosa* as a model bacterium

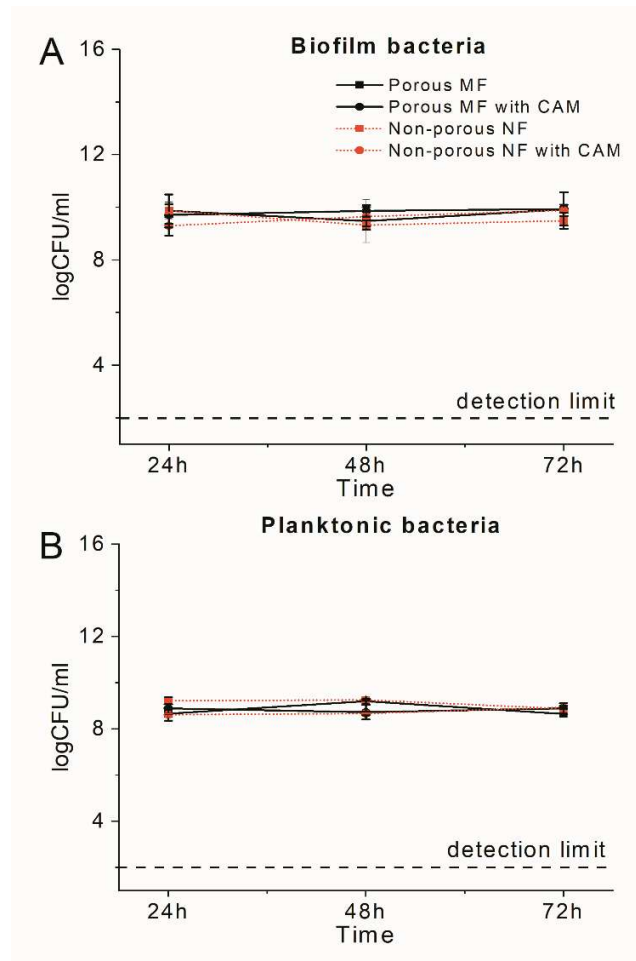

**Figure S5. A.** Antibacterial activity of porous and non-porous electrospun PCL microfiber and nanofiber scaffolds without and with CAM on *P. aeruginosa* **B.** and biofilm formation and antibiofilm activity. Regarding exact formulations reference is made to **Figure 1**. Key: biofilm bacteria – biofilm bacteria washed off from fiber scaffold; CAM – chloramphenicol; MF- microfiber; NF- nanofiber; planktonic bacteria –bacteria from the well where fiber scaffold was removed. Detection limit refers to the CFU that can be counted by plate method (200 CFU/ml).
